# Supplementary material for: FytoSol, a Promising Plant Defense Elicitor, Controls Early Blight (Alternaria solani) Disease in the Tomato by Inducing Host Resistance-Associated Gene Expression
Source: MDPI journal article supplement (doi:10.3390/horticulturae8060484), 2022-05-28
Supplement: s1 [file s1]

**Table S1.** List of tomato genes and corresponding primers used for the gene expression analysis.

| Gene              | Primer Sequence (5'–3')                                      | References |
|-------------------|--------------------------------------------------------------|------------|
| <i>PR5</i>        | F: GCAACAACGTGCCATACACC<br>R: AGACTCCACCACAATCACC            | [83]       |
| <i>WRKY70</i>     | F: CATGGATGAGAGAATCTGCA<br>R: GGATTTTCTTGGATTATTTGAAC        | [84]       |
| <i>WRKY33b</i>    | F: CCACAACAGTCTGAAATGGG<br>R: CAGCAAAGCAATGACTCCAT           | [51]       |
| <i>Pti4</i>       | F: CAACAGTTACCACCGACGAAC<br>R: GACCAATAGTTGATGGACACCTG       | [51]       |
| <i>TomloxD</i>    | F: CCCTCTCTACCCAAATTCATTAG<br>R: GGTAGATGGACTTAAGCTAGT       | [51]       |
| <i>PRB1-2</i>     | F: CGGTGAACACTGGAAATGTG<br>R: GGAGCATCGCCATTAATCAT           | [61]       |
| <i>SABP2</i>      | F: AACGGACACCAGCAGAGAAT<br>R: TGGCCTTTGACAAATCTTCC           | [61]       |
| <i>Pto kinase</i> | F: AGATTGAACCATGGCAGACC<br>R: GATACTCTCACGCCGTAGCC           | [58]       |
| <i>PR3</i>        | F: CAATTCGTTTCCAGGTTTTG<br>R: ACTTTCCGCTGCAGTATTTG           | [58]       |
| <i>TPK1b</i>      | F: ATGGGGATATGTTTGAGTGCTAGAA R:<br>GAACGTGTTCTCGTCGATCCACCCT | [85]       |
| <i>Actin</i>      | F: TGTCCCTATTTACGAGGGTTATGC<br>R: CAGTTAAATCACGACCAGCAAGAT   | [67]       |

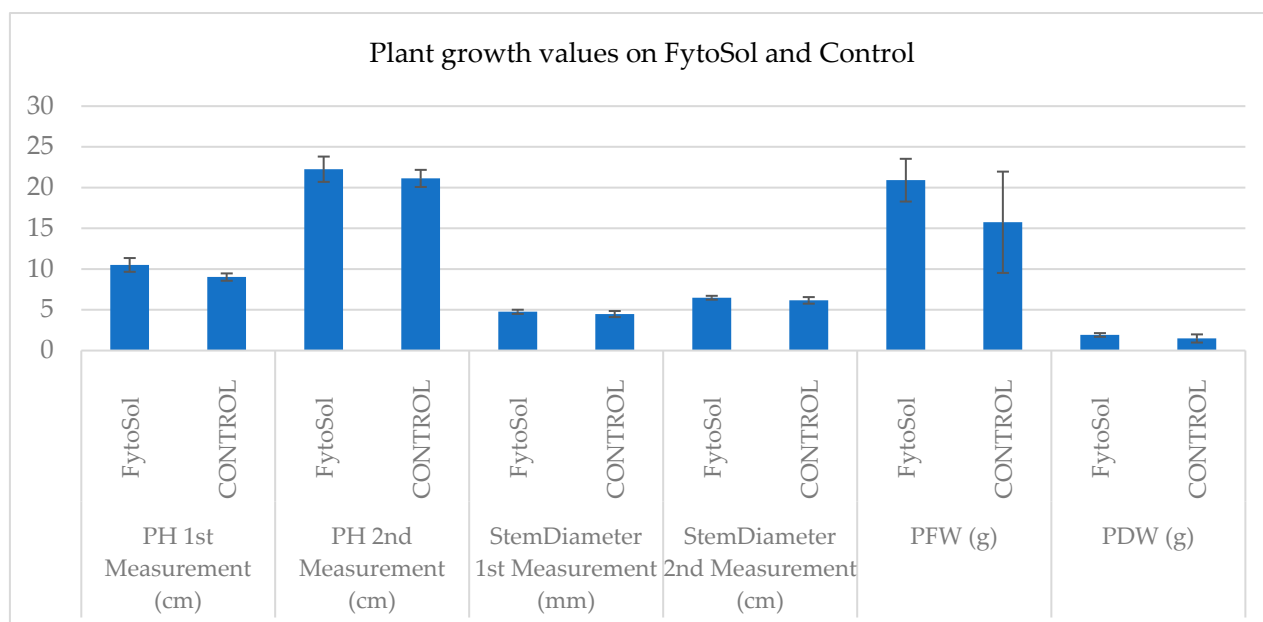

**Figure S1.** The effects of FytoSol on growth parameters; plant height (PH) first and second measurements, stem diameter first and second measurements, plant fresh (PFW), and dry (PDW) weights on uninfected tomato plants. Means followed by different letters are significantly different according to the LSD test ( $p < 0.05$ ).
